# Supplementary material
Source: publisher site journal article supplement (https://www.spandidos-publications.com/4884/downloadSupplementary)

Figure S1. Kaplan-Meier representations of OS, depending on patients' characteristics and clinical parameters. OS, overall survival.

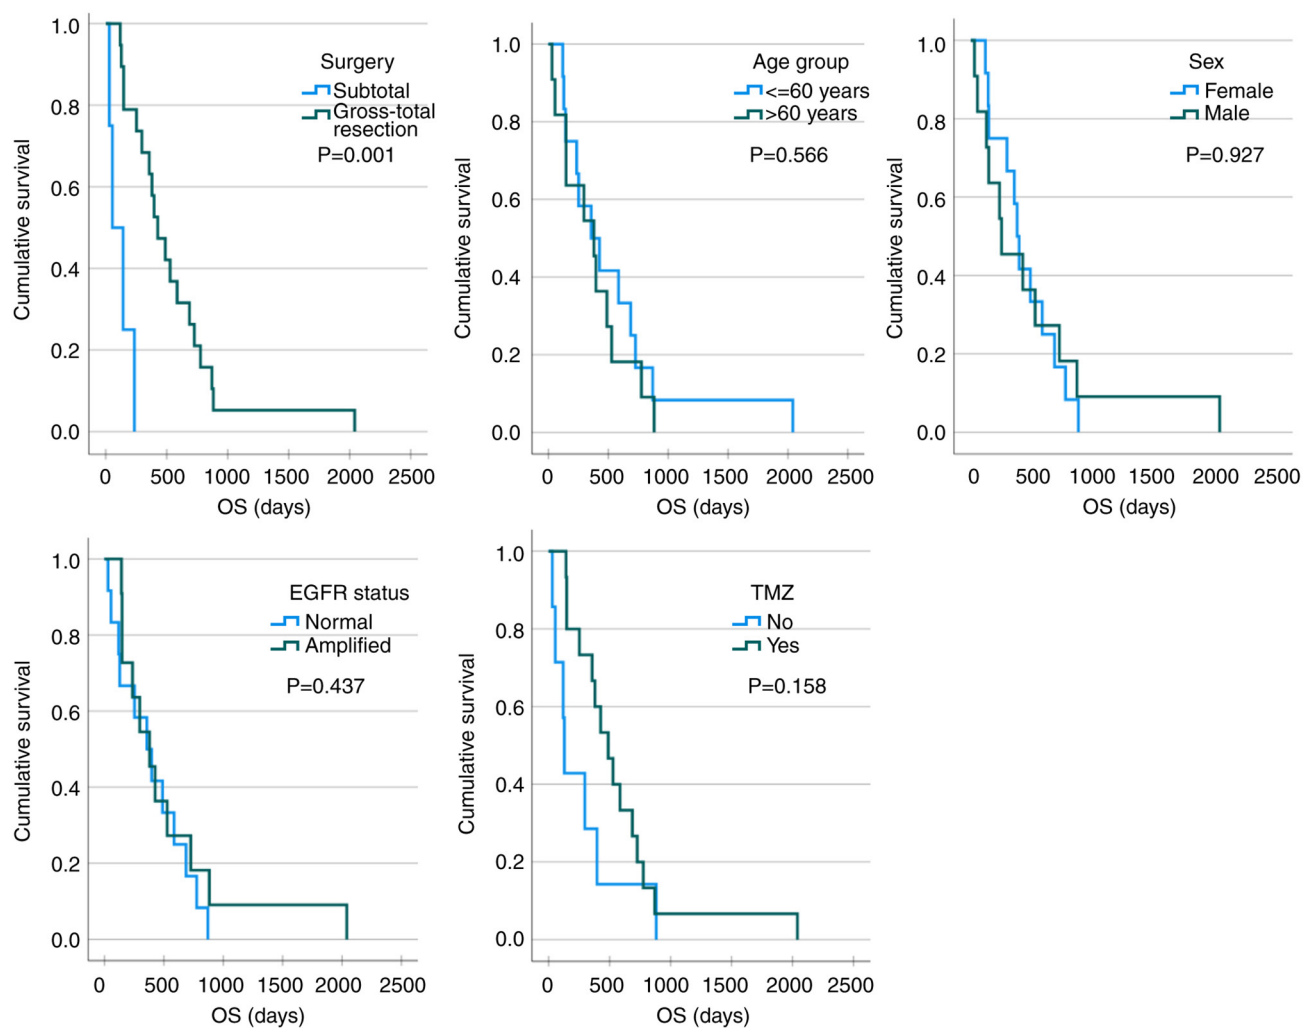

Supplement: Supplementary file 1 [file downloadSupplementary]
